# Supplementary material for: Effectiveness and Satisfaction of Virtual Dissection on Medical Students: Randomized Controlled Trials Compared to Cadaver Dissection
Source: Research Square preprint supplement (doi:10.21203/rs.3.rs-4175504/v1), 2024-04-27
Supplement: Supplementary file 2 [file 63a6c951bdedbcd63dbd0c06.docx]

**Supplementary video 1.** Heart model content from head-mounted display laboratory.

**Supplementary video 2.** Heart model content from life-sized touchscreen laboratory.

**Supplementary video 3.** Heart model content from tablet-based laboratory.

**Supplementary video 4.** Diencephalon model content from tablet-based laboratory.
